# Supplementary material for: Syntheses, crystal structures, thermal stability, magnetism and luminescence of four new metal phosphonates
Source: Royal Society of Chemistry journal article supplement (doi:10.1039/c2ce26368h), 2012-12-07
Supplement: c2ce26368h.pdf [file c2ce26368h.pdf]

## Supplementary information

### Syntheses, crystal structures, magnetism, thermal stabilities and luminescence of four new metal phosphonates

Ruibiao Fu\*, Shengmin Hu, Xintao Wu

State Key Laboratory of Structural Chemistry, Fujian Institute of Research on the  
Structure of Matter, Chinese Academy of Science, Fuzhou, Fujian, 350002 China

● Corresponding author. E-mail: furb@fjirsm.ac.cn

**Table S1.** Selected bond lengths (Å) and angles (°) for **2**.

|                                                                                                                                                                                                   |            |                                            |            |
|---------------------------------------------------------------------------------------------------------------------------------------------------------------------------------------------------|------------|--------------------------------------------|------------|
| Mn(1)-N(1)                                                                                                                                                                                        | 2.336(5)   | Mn(2)-O(1)                                 | 2.233(4)   |
| Mn(1)-N(2) <sup>c</sup>                                                                                                                                                                           | 2.366(5)   | Mn(2)-O(1) <sup>a</sup>                    | 2.233(4)   |
| Mn(1)-O(1)                                                                                                                                                                                        | 2.281(4)   | Mn(2)-O(1) <sup>b</sup>                    | 2.233(4)   |
| Mn(1)-O(2) <sup>a</sup>                                                                                                                                                                           | 2.042(4)   | Mn(2)-O(1) <sup>d</sup>                    | 2.237(4)   |
| Mn(1)-O(3) <sup>b</sup>                                                                                                                                                                           | 2.070(5)   | Mn(2)-O(1) <sup>e</sup>                    | 2.233(4)   |
| Mn(1)-O(4)                                                                                                                                                                                        | 2.299(6)   | Mn(2)-O(1) <sup>f</sup>                    | 2.233(4)   |
|                                                                                                                                                                                                   |            |                                            |            |
| N(1)-Mn(1)-N(2) <sup>c</sup>                                                                                                                                                                      | 98.49(17)  | O(1)-Mn(2)-O(1) <sup>a</sup>               | 91.88(14)  |
| N(1)-Mn(1)-O(1)                                                                                                                                                                                   | 82.75(14)  | O(1)-Mn(2)-O(1) <sup>b</sup>               | 88.12(14)  |
| N(1)-Mn(1)-O(2) <sup>a</sup>                                                                                                                                                                      | 152.4(2)   | O(1)-Mn(2)-O(1) <sup>d</sup>               | 88.12(14)  |
| N(1)-Mn(1)-O(3) <sup>b</sup>                                                                                                                                                                      | 102.07(18) | O(1)-Mn(2)-O(1) <sup>e</sup>               | 180.0      |
| N(1)-Mn(1)-O(4)                                                                                                                                                                                   | 70.86(17)  | O(1)-Mn(2)-O(1) <sup>f</sup>               | 91.88(14)  |
| N(2) <sup>c</sup> -Mn(1)-O(1)                                                                                                                                                                     | 177.14(18) | O(1) <sup>a</sup> -Mn(2)-O(1) <sup>b</sup> | 88.12(14)  |
| N(2) <sup>c</sup> -Mn(1)-O(2) <sup>a</sup>                                                                                                                                                        | 88.29(19)  | O(1) <sup>a</sup> -Mn(2)-O(1) <sup>d</sup> | 179.997(1) |
| N(2) <sup>c</sup> -Mn(1)-O(3) <sup>b</sup>                                                                                                                                                        | 91.28(19)  | O(1) <sup>a</sup> -Mn(2)-O(1) <sup>e</sup> | 88.12(14)  |
| N(2) <sup>c</sup> -Mn(1)-O(4)                                                                                                                                                                     | 84.3(2)    | O(1) <sup>a</sup> -Mn(2)-O(1) <sup>f</sup> | 91.88(14)  |
| O(1)-Mn(1)-O(2) <sup>a</sup>                                                                                                                                                                      | 91.77(16)  | O(1) <sup>b</sup> -Mn(2)-O(1) <sup>d</sup> | 91.88(14)  |
| O(1)-Mn(1)-O(3) <sup>b</sup>                                                                                                                                                                      | 85.94(16)  | O(1) <sup>b</sup> -Mn(2)-O(1) <sup>e</sup> | 91.88(14)  |
| O(1)-Mn(1)-O(4)                                                                                                                                                                                   | 98.54(18)  | O(1) <sup>b</sup> -Mn(2)-O(1) <sup>f</sup> | 180.0      |
| O(2) <sup>a</sup> -Mn(1)-O(3) <sup>b</sup>                                                                                                                                                        | 104.5(2)   | O(1) <sup>d</sup> -Mn(2)-O(1) <sup>e</sup> | 91.88(14)  |
| O(2) <sup>a</sup> -Mn(1)-O(4)                                                                                                                                                                     | 83.4(2)    | O(1) <sup>d</sup> -Mn(2)-O(1) <sup>f</sup> | 88.12(14)  |
| O(3) <sup>b</sup> -Mn(1)-O(4)                                                                                                                                                                     | 170.91(18) | O(1) <sup>e</sup> -Mn(2)-O(1) <sup>f</sup> | 88.12(14)  |
| Symmetry codes: a - y + 1, x - y + 1, z; b x - y + 2/3, x + 1/3, - z + 1/3; c y - 1, - x + y, - z; d y - 1/3, - x + y + 1/3, - z + 1/3; e - x + 2/3, - y + 4/3, - z + 1/3; f - x + y, - x + 1, z. |            |                                            |            |

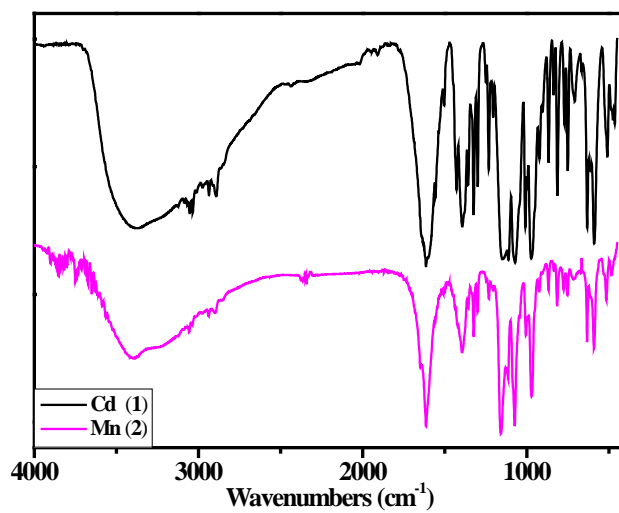

**Fig. S1** IR curves of **1** and **2**.

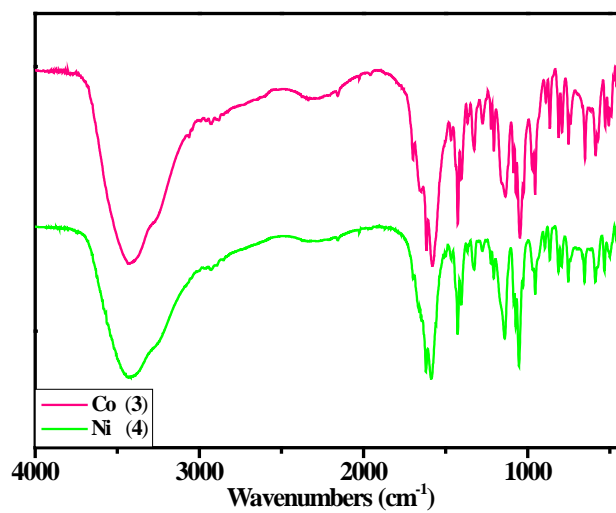

**Fig. S2** IR curves of **3** and **4**.

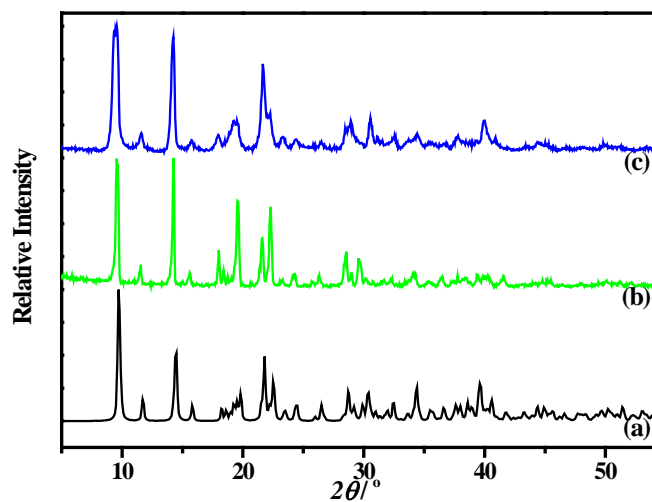

**Fig. S3** XRD patterns of **3** (a) simulated from single-crystal X-ray data, and experimental data for solids **3** (b) and **4** (c).

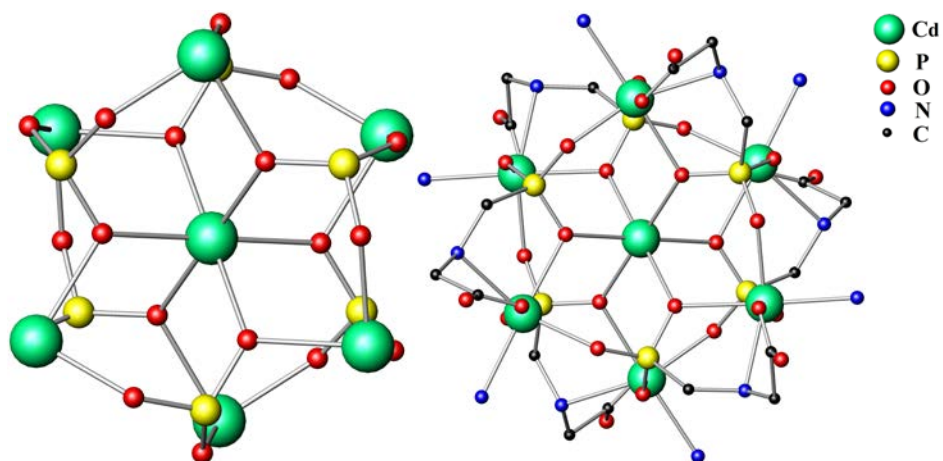

**Fig. S4** Ball-stick view of the Cd<sub>7</sub> hepta-nuclear unit in **1**.

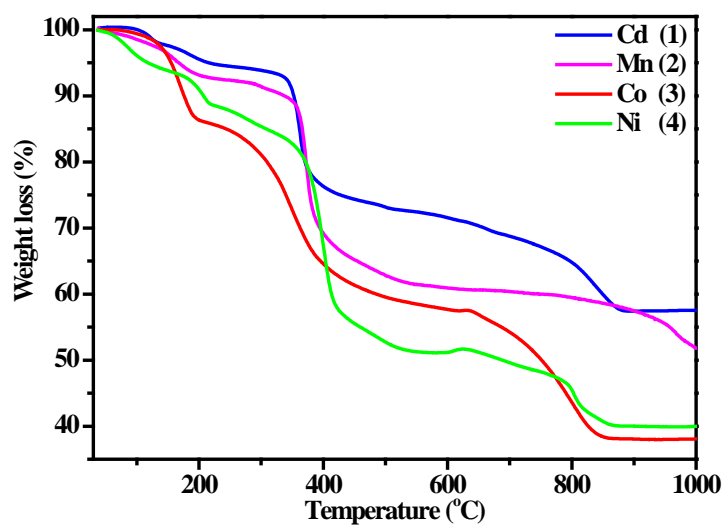

Fig. S5 TGA curves of 1-4.

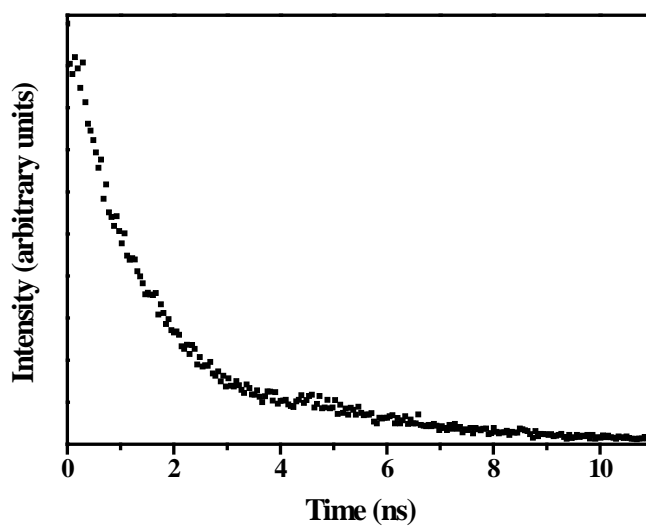

Fig. S6 Room-temperature solid-state fluorescent intensity as a function of time for **1** with  $\lambda_{em} = 430$  nm.

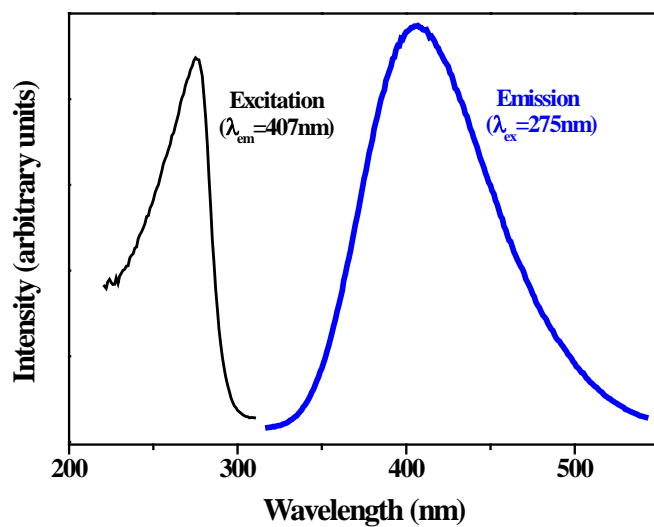

**Fig. S7** Emission and excitation spectra for **1** at room temperature.

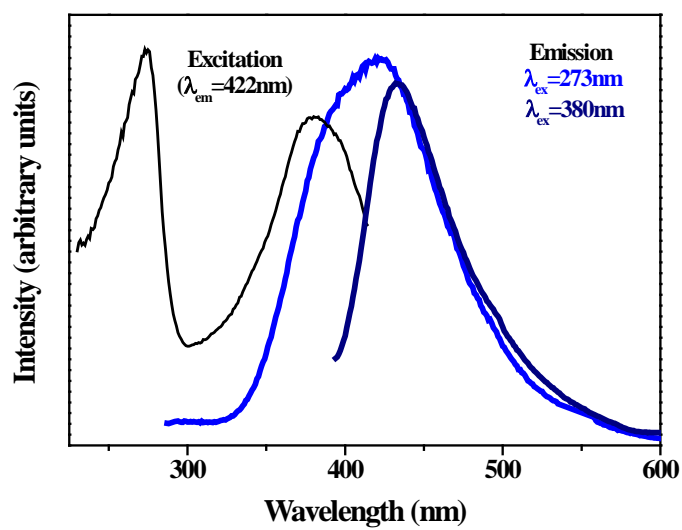

**Fig. S8** Emission and excitation spectra for solid **1-200** at room temperature.

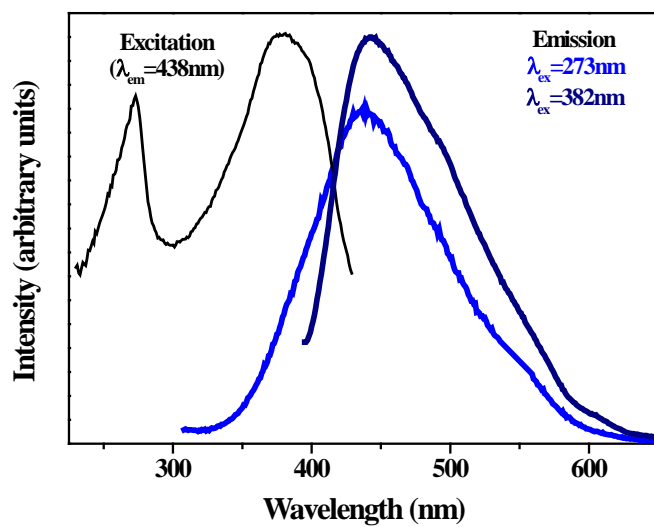

Fig. S9 Emission and excitation spectra for solid 1-250 at room temperature.

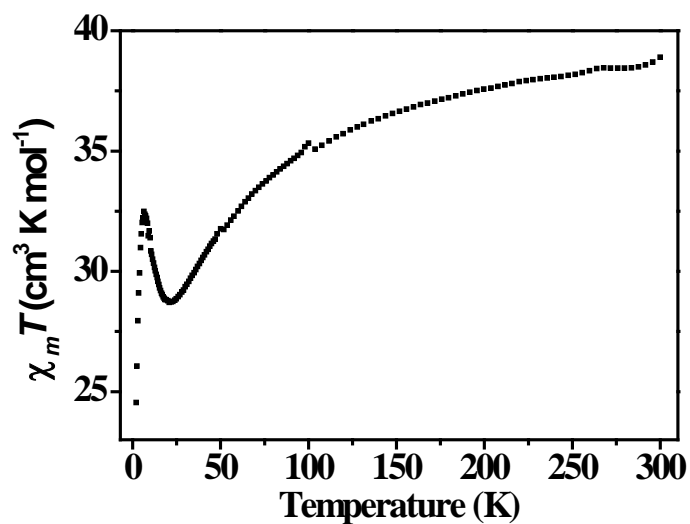

Fig. S10 The  $\chi_m T$  versus  $T$  curve per  $\text{Mn}_7$  unit in 2.

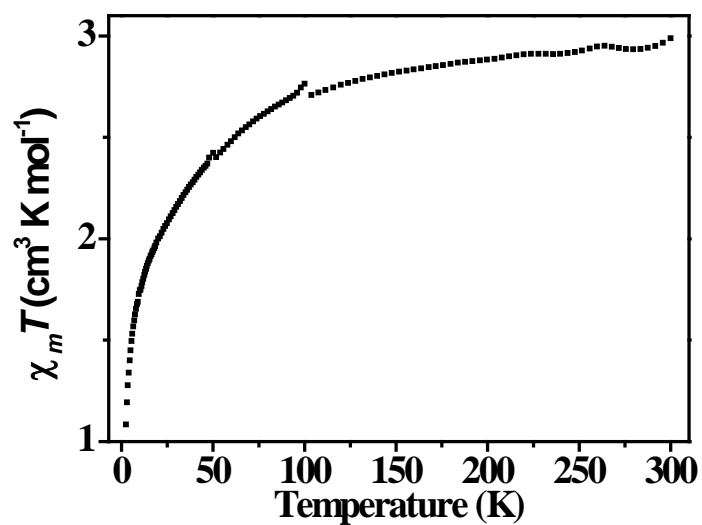

Fig. S11 The  $\chi_m T$  versus  $T$  curve per Co unit in **3**.

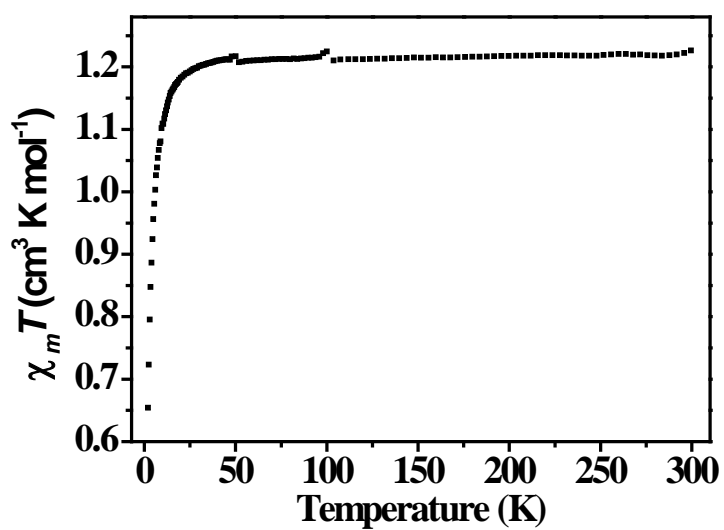

Fig. S12 The  $\chi_m T$  versus  $T$  curve per Ni unit in **4**.
